# Supplementary material for: Synthesis of visible-light-absorptive and hole-transporting periodic mesoporous organosilica thin films for organic solar cells
Source: Royal Society of Chemistry journal article supplement (doi:10.1039/c4ta01136h), 2014-01-01
Supplement: c4ta01136h1.pdf [file c4ta01136h1.pdf]

Electronic Supplementary Information (ESI)

## ***Electronic Supplementary Information (ESI)***

# Synthesis of visible-light-absorptive and hole-transporting periodic mesoporous organosilica thin films for organic solar cells

Masamichi Ikai,<sup>‡,a,b,c</sup> Yoshifumi Maegawa,<sup>‡,a,b,c</sup> Yasutomo Goto,<sup>a,b,c</sup> Takao Tani <sup>a,b</sup>  
and Shinji Inagaki<sup>\*a,b,c</sup>

<sup>a</sup> Toyota Central R&D Labs., Inc., Nagakute, Aichi 480-1192, Japan

<sup>b</sup> Core Research and Evolution Science and Technology (CREST),  
Japan Science and Technology Agency (JST), Japan

<sup>c</sup> Advanced Catalytic Transformation program for Carbon utilization (ACT-C),  
Japan Science and Technology Agency (JST), Japan

| <b>Contents</b>                                                                      | <b>page</b>  |
|--------------------------------------------------------------------------------------|--------------|
| <b>NMR spectra of organosilane precursors (Figures S1, S2)</b>                       | <b>S2-S3</b> |
| <b>Krypton adsorption–desorption isotherms (Figure S3)</b>                           | <b>S4</b>    |
| <b>Pore size distribution of mesopores (Figure S4)</b>                               | <b>S5</b>    |
| <b>UV-vis absorption spectra (Figures S5, S6)</b>                                    | <b>S6</b>    |
| <b>Ionization Potentials (Figure S7)</b>                                             | <b>S7</b>    |
| <b><i>J-V</i> characteristics of devices with/without a buffer layer (Figure S8)</b> | <b>S8</b>    |

---

<sup>‡</sup> M. I. and Y. M. equally contributed to this article.

<sup>\*</sup> Corresponding author, E-mail: inagaki@mosk.tytlabs.co.jp



Electronic Supplementary Information (ESI)

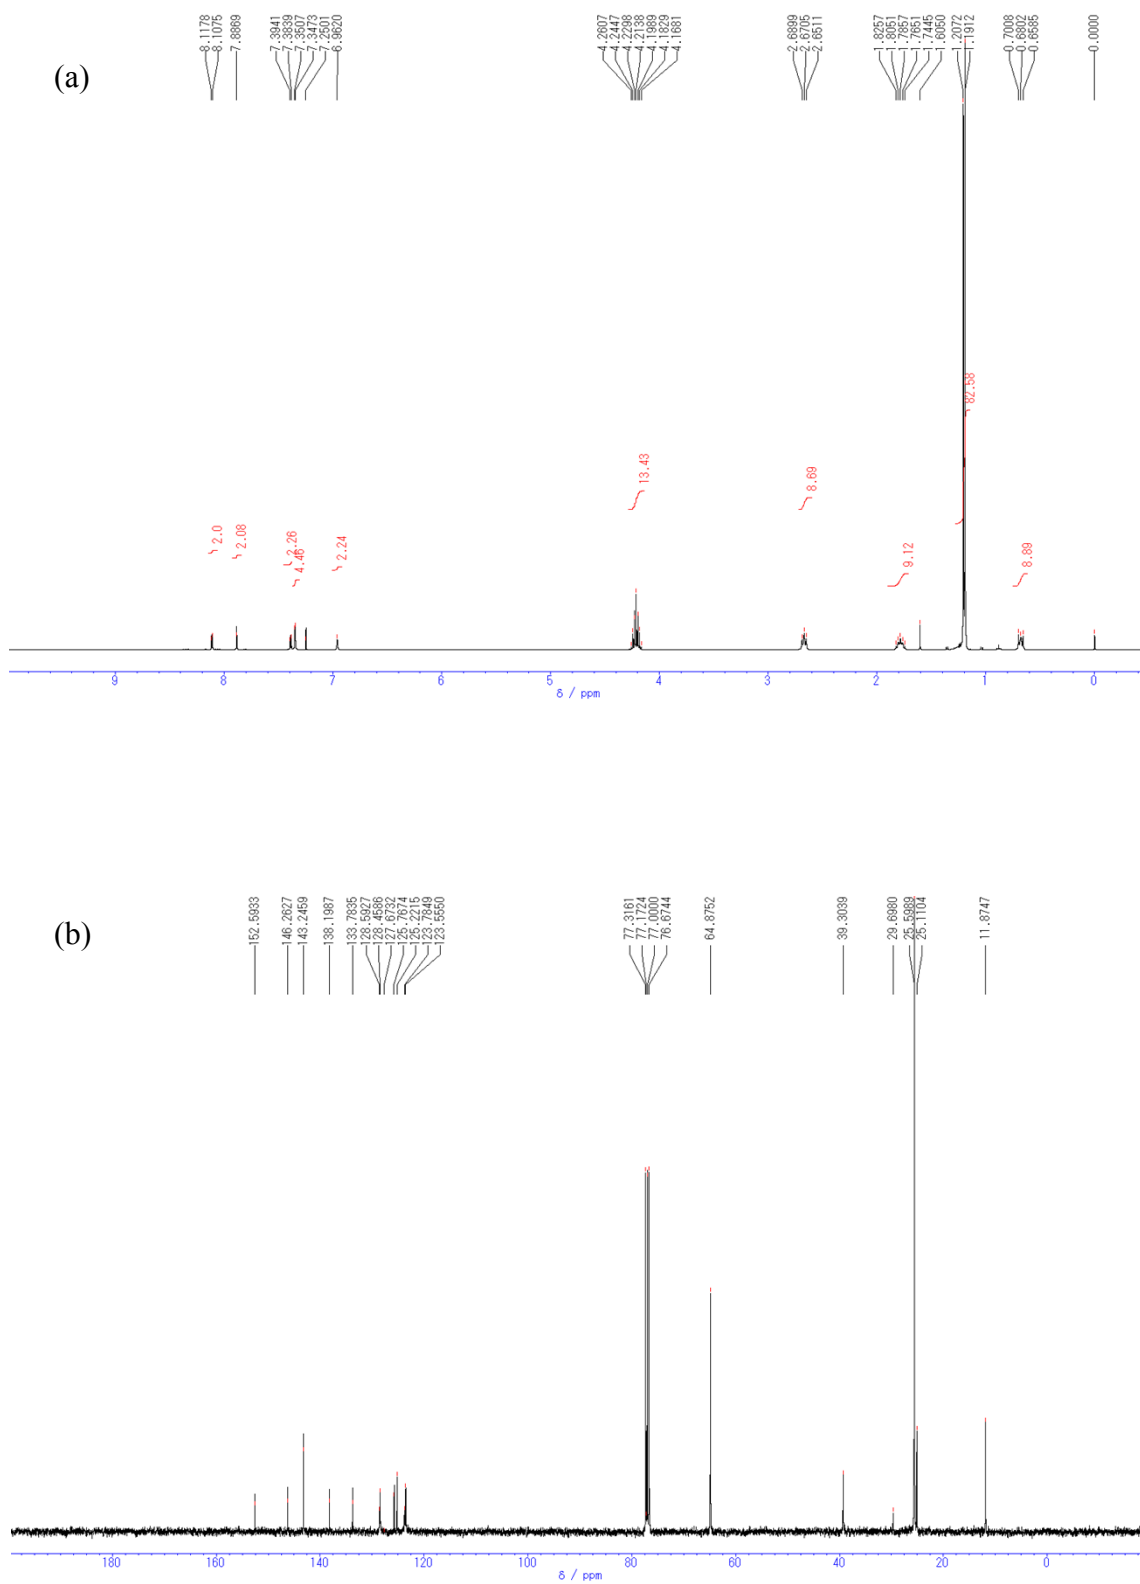

**Figure S2.** (a)  $^1\text{H}$  NMR and (b)  $^{13}\text{C}$  NMR spectra of organosilane precursor **2** in  $\text{CDCl}_3$ .

### Krypton adsorption–desorption isotherms

Krypton adsorption–desorption isotherms were measured using a Quantachrome Autosorb-1 at 87 K. The films (**1-PMO-F**) were formed on 16 cleaned glass substrates (24 mm×32 mm×0.15 mm) by spin-coating sol C and extracting templates. The total weight of **1-PMO-F** (16 peices) was 0.31 mg. The samples were sliced into pieces and placed in a special cell for the measurements of isotherms.

Figure S3 shows a krypton adsorption–desorption isotherm of **1-PMO-F** on glass substrates. The Brunauer–Emmett–Teller (BET) surface area was calculated to be 285 m<sup>2</sup> g<sup>-1</sup>.

From SEM images of **1-PMO-F**, we estimated the number of mesopores with a diameter of 15 nm to be 18 in a unit cell of (50×50×50) nm<sup>3</sup>. Using this information and the weight of **1-PMO-F** measured (0.31 mg), we estimated that the surface area is 225 m<sup>2</sup> g<sup>-1</sup>. There is no large difference between the value obtained from the experiment and the estimated value.

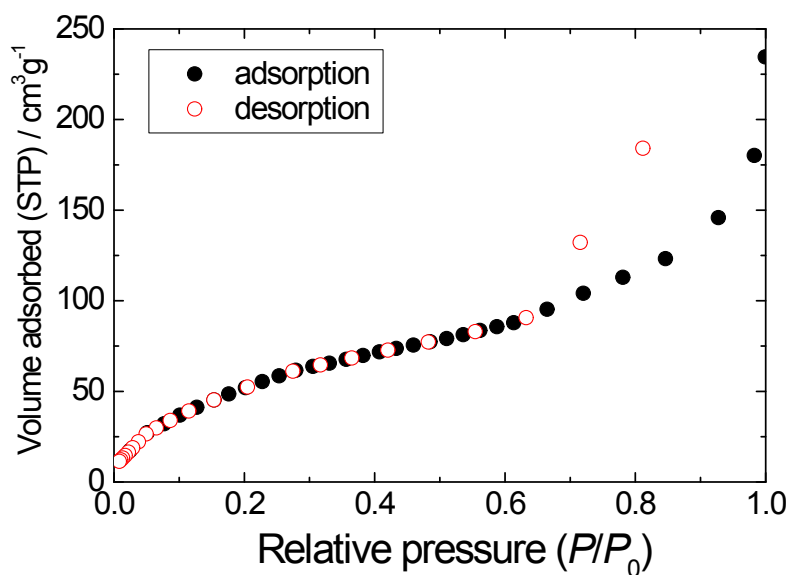

**Figure S3.** Krypton adsorption–desorption isotherm of **1-PMO-F**.

### Pore size distribution of mesopores

We analyzed the pore size distribution for mesopores in top-view SEM images of **1-PMO-F** using an image analysis software. Figure S4 shows pore size distribution of mesopores. Three different SEM images were used (analyzed area:  $1.1 \mu\text{m}^2$ ).

From this analysis, we obtained the average pore size for mesopores and its standard deviation. Those values are 15 and 4 nm, respectively. The coefficient of variation (standard deviation / average pore diameter) is about 0.28. The value is similar to that (0.22\*) of a conventional PMO film which was estimated by the pore size distribution curve derived from nitrogen adsorption.<sup>16</sup>

(\* The value of 0.22 was estimated from inset data of Fig. S7 in ESI (reference 16).)

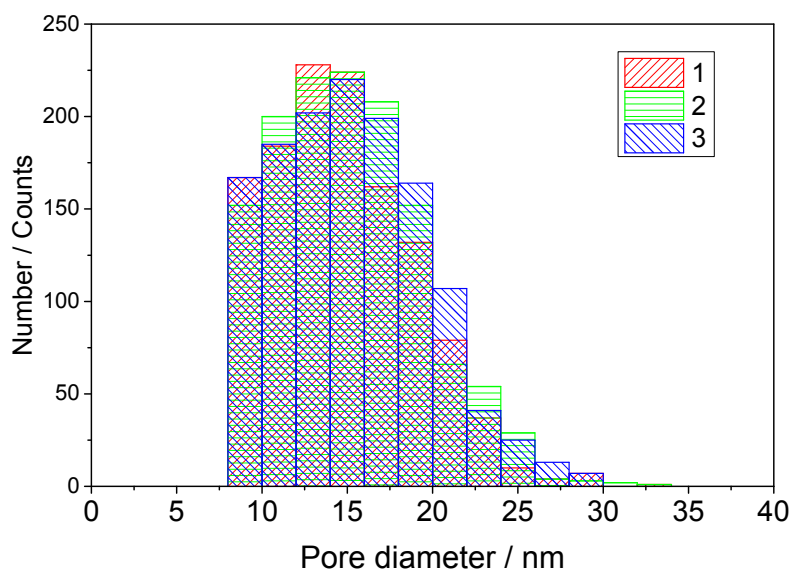

**Figure S4.** Pore size distribution of mesopores for **1-PMO-F**. Three different Top-view SEM images were analyzed.

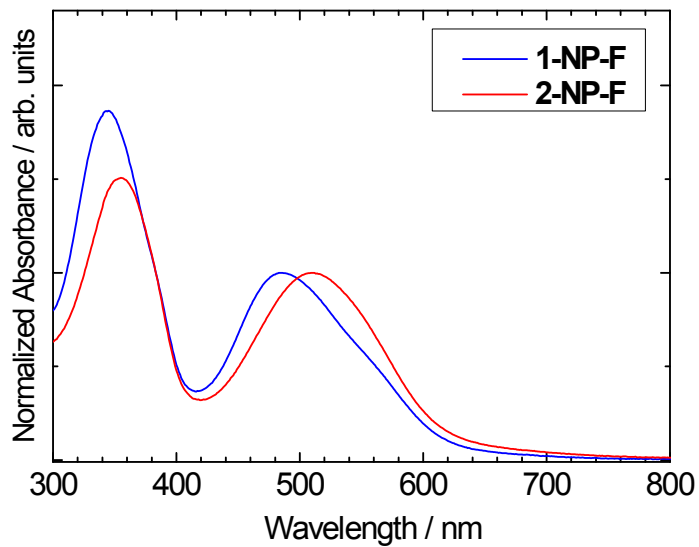

**Figure S5.** Normalized absorbance of both **1-NP-F** (blue) and **2-NP-F** (red) films.

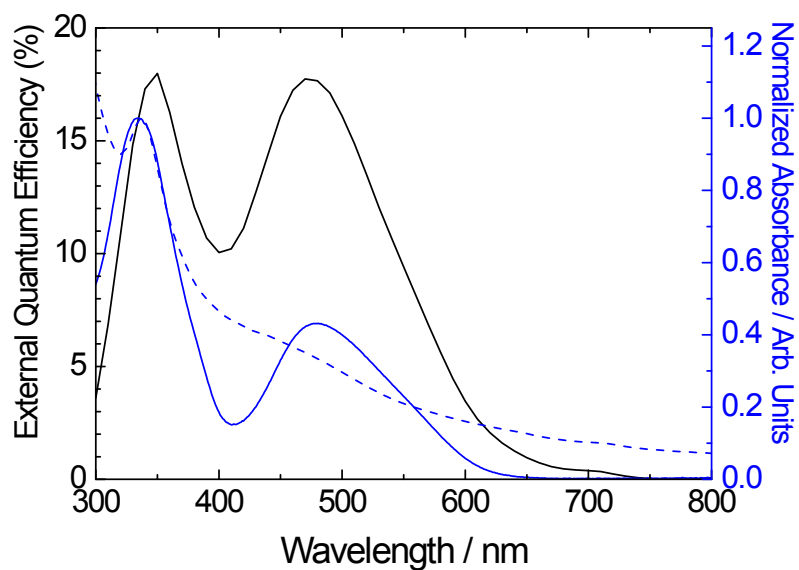

**Figure S6.** EQE of the **1-PMO-F** based solar cell (black, solid), and normalized absorbance of both **1-PMO-F** (blue, solid) and PCBM (blue, dashed) films.

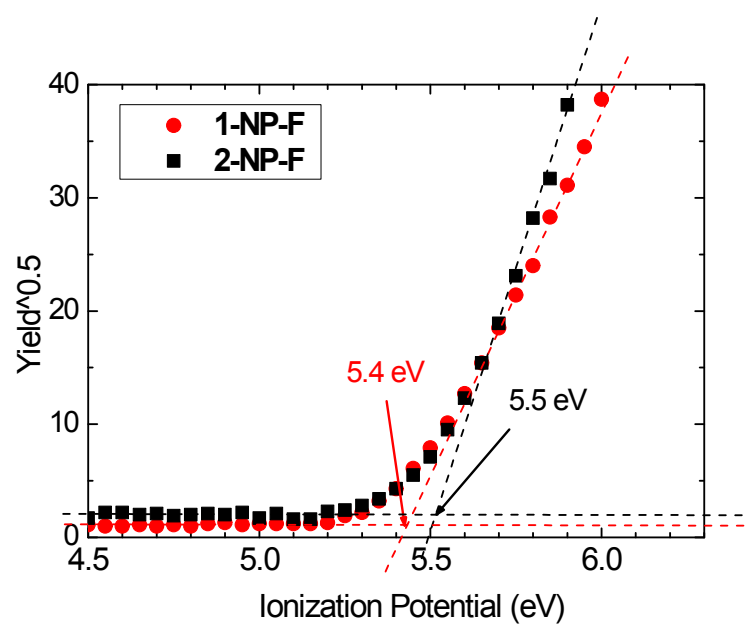

**Figure S7.** Ionization potentials of 1-NP-F and 2-NP-F measured by using AC-2.

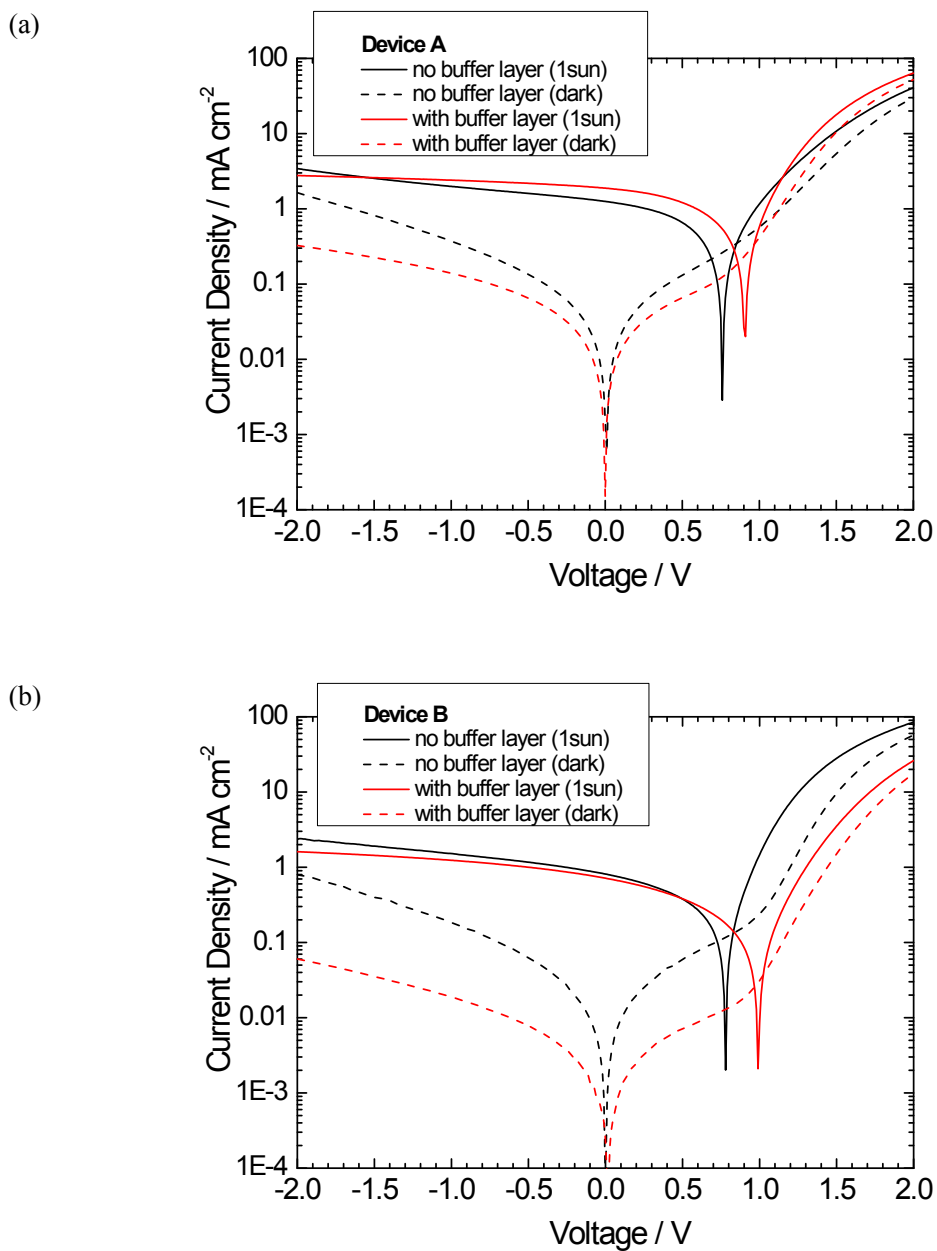

**Figure S8.**  $J$ - $V$  characteristics of (a) **device A** or (b) **device B** without a buffer layer (black lines) and with **1'-NP-F** buffer layer (red lines) in the dark (broken lines) and under 1 sun, AM1.5 illumination (solid lines).
